# Supplementary material for: Giant Rashba-splitting of one-dimensional metallic states in Bi dimer lines on InAs(100)
Source: Royal Society of Chemistry journal article supplement (doi:10.1039/d4nr01591f), 2024-01-01
Supplement: d4nr01591f1.pdf [file d4nr01591f1.pdf]

**Supplemental Information file for the paper entitled:**

**Giant Rashba-Splitting of One-Dimensional Metallic States in Bi Dimer Lines on  
InAs(100)**

Polina M. Sheverdyeva<sup>1</sup>, Gustav Bihlmayer<sup>2</sup>, Silvio Modesti<sup>3,4</sup>, Vitaliy Feyer<sup>5</sup>, Matteo Jugovac<sup>1,5</sup>, Giovanni Zamborlini<sup>5,6,7</sup>, Christian Tusche<sup>5,8</sup>, Ying-Jiun Chen<sup>5,8</sup>, Xin Liang Tan<sup>5</sup>, Kenta Hagiwara<sup>5</sup>, Luca Petaccia<sup>9</sup>, Sangeeta Thakur<sup>9,10</sup>, Asish K. Kundu<sup>1,11,12</sup>, Carlo Carbone<sup>1</sup>,  
and Paolo Moras<sup>1</sup>

<sup>1</sup>CNR-Istituto di Struttura della Materia (CNR-ISM), Strada Statale 14 km 163.5, 34149 Trieste, Italy

<sup>2</sup>Peter Grünberg Institut (PGI-1), Forschungszentrum Jülich and JARA, D-52425 Jülich, Germany

<sup>3</sup>Dipartimento di Fisica, Università di Trieste, 34127 Trieste, Italy

<sup>4</sup>CNR-Istituto Officina dei Materiali (CNR-IOM), 34149 Trieste, Italy

<sup>5</sup>Peter Grünberg Institute (PGI-6), Forschungszentrum Jülich, 52428 Jülich, Germany

<sup>6</sup>TU Dortmund University, Otto-Hahn-Straße 4, 44227 Dortmund, Germany

<sup>7</sup>Institute of Physics, University of Graz, Universitätsplatz 5, 8010 Graz, Austria

<sup>8</sup>Fakultät für Physik, Universität Duisburg-Essen, 47057 Duisburg, Germany

<sup>9</sup>Elettra Sincrotrone Trieste, Strada Statale 14 km 163.5, 34149 Trieste, Italy

<sup>10</sup>Institut für Experimentalphysik, Freie Universität Berlin, Arnimallee 14, D-14195 Berlin, Germany

<sup>11</sup>National Synchrotron Light Source II, Brookhaven National Laboratory, Upton, New York 11973, USA

<sup>12</sup>International Center for Theoretical Physics (ICTP), 34151 Trieste, Italy

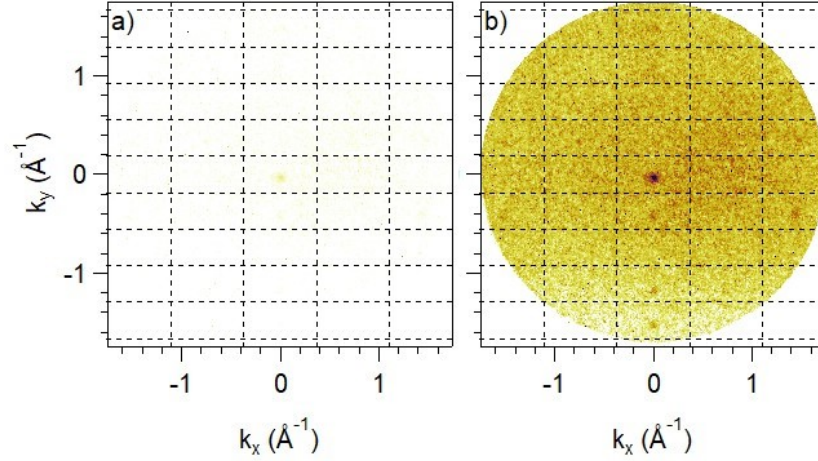

**Fig. S1.** Constant energy cut (0.15 eV below  $E_F$ ) of the photoelectron signal of the  $(4\times 2)/c(8\times 2)$ -terminated  $InAs(100)$  substrate taken with the momentum microscope under the same experimental conditions of Fig. 3(a). The color scale in panel (a) is the same of Fig. 3(a), while panel (b) uses a color scale that enhances very low intensity electronic features. The dashed lines indicate the edges of the  $(4\times 2)$  SBZ. The small circles are charge accumulation states derived from the  $InAs$  conduction band. These states are visible at some  $\bar{\Gamma}$  points of  $(4\times 2)$  SBZs, which are also  $\bar{\Gamma}$  points of the hexagonal-like  $c(8\times 2)$  SBZs (not shown).

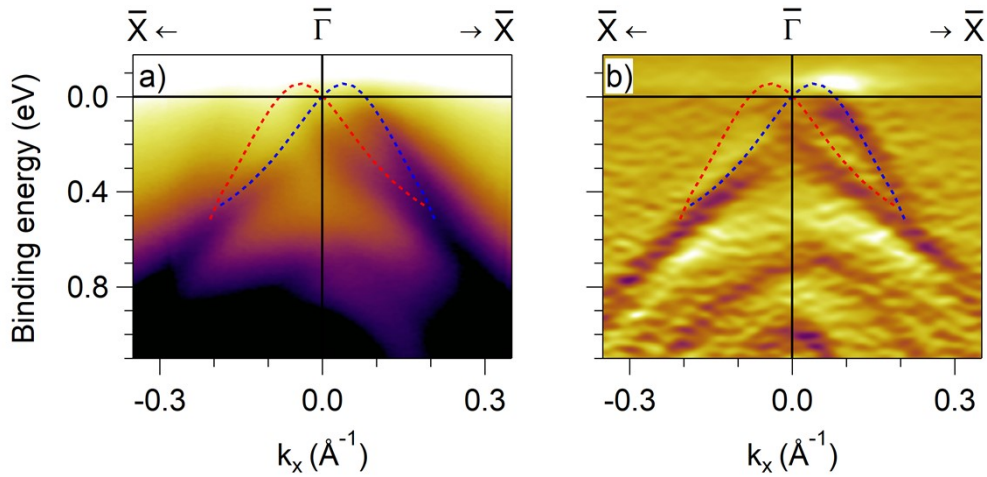

**Fig. S2.** ARPES spectra taken at the BaDElPh beamline with  $h\nu = 22$  eV along the same segment probed in Fig. 3(e) and corresponding to the  $\bar{X}-\bar{\Gamma}-\bar{X}$  direction. Panels (a) and (b) report the original and second derivative data, respectively. The slight discrepancy with the

calculated  $S_3$  and  $S_4$  bands (dashed lines) can indicate a larger  $\alpha_R$  value in the experiment than in the theory.

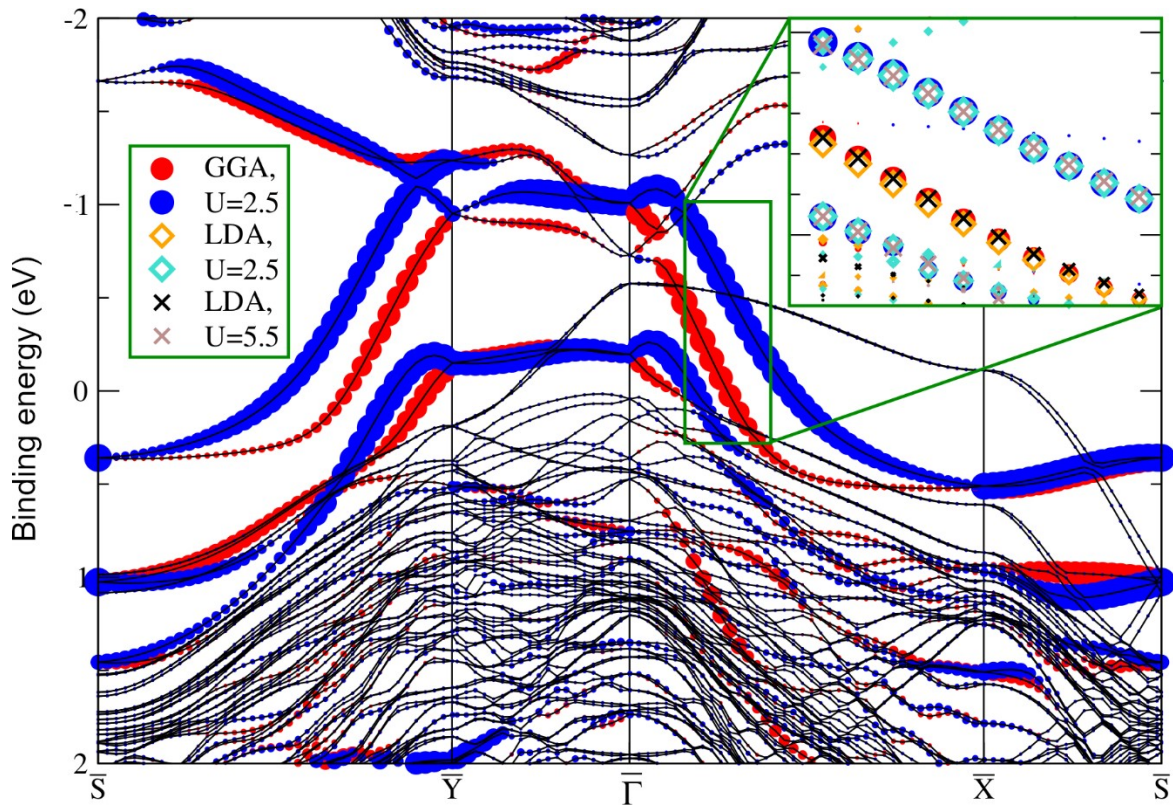

**Fig. S3.** Spin-resolved DFT calculations with the same computational parameters as in the main text but using GGA [1] as exchange correlation functional. The size of the symbols is proportional to the in-plane component of the spin polarization perpendicular to the  $k$ -vector. The zoom shows the details of the  $S_1/S_2$  bands calculated using GGA and using LDA with different  $U$  terms (to introduce the local potential on the  $p$ -states) that show marginal differences.

## References

- [1] J. P. Perdew, K. Burke, and M. Ernzerhof, Generalized gradient approximation made simple, Phys. Rev. Lett. **77**, 3865 (1996).
